# 1 Wild birds as reservoirs of multidrug-resistant enterobacteria in 2 Mulungu, Brazil

3  
4 Antonio Jackson Forte Beleza\*<sup>1</sup> (Corresponding author: [jacksonfortemv@gmail.com](mailto:jacksonfortemv@gmail.com));  
5 William Cardoso Maciel<sup>1</sup> ([william.maciel@uol.com.br](mailto:william.maciel@uol.com.br)); Arianne Silva Carreira<sup>1</sup>  
6 ([ariannecarreira@hotmail.com](mailto:ariannecarreira@hotmail.com)); Adson Ribeiro Marques<sup>1</sup>  
7 ([adsonribeiomarques@gmail.com](mailto:adsonribeiomarques@gmail.com)); Carlos Henrique Guedes Nogueira<sup>1</sup>  
8 ([chgn4567@gmail.com](mailto:chgn4567@gmail.com)); Neilton Monteiro Pascoal Filho<sup>1</sup> ([m.neilton@yahoo.com.br](mailto:m.neilton@yahoo.com.br));  
9 Bruno Pessoa Lima<sup>1</sup> ([bplima2002@yahoo.com.br](mailto:bplima2002@yahoo.com.br)); Isaac Neto Goes da Silva<sup>1</sup>  
10 ([isaac.neto@uece.br](mailto:isaac.neto@uece.br)); Ruben Horn Vasconcelos<sup>2</sup> ([rubenhorn@hotmail.com](mailto:rubenhorn@hotmail.com)); Leandro  
11 Rodrigues Ribeiro<sup>3</sup> ([leandrorvet@gmail.com](mailto:leandrorvet@gmail.com)); Régis Siqueira de Castro Teixeira<sup>1</sup>  
12 ([regis\\_siqueira\\_teixeira@yahoo.com.br](mailto:regis_siqueira_teixeira@yahoo.com.br))

13  
14 <sup>1</sup> Affiliation: Postgraduate Program in Veterinary Science, Veterinary Faculty, State  
15 University of Ceará. Av. Dr. Silas Munguba, 1700, Campus do Itaperi. Zip Code:  
16 60740-903 Fortaleza, Ceará, Brasil

17  
18 <sup>2</sup> Affiliation: Laboratory of Animal Anatomy and Pathology, Federal University of the  
19 Agreste of Pernambuco. Av. Bom Pastor, s/n.º - Boa Vista, Garanhuns – PE, 55292-270

20  
21 <sup>3</sup> Affiliation: Fazenda Haras Claro, Rod Br 020 Km 381 Bom Princípio, 61600900  
22 Caucaia, CE

23  
24 Corresponding author  
25 E-mail: [jacksonfortemv@gmail.com](mailto:jacksonfortemv@gmail.com)

## 26 ABSTRACT

27 Caatinga is a biome unique to Brazil that is degraded by anthropogenic actions, which  
28 lead to the loss of biodiversity putting many species at risk of extinction. The Ceará  
29 State is located in the Caatinga and has a rich avifauna comprised of 433 species  
30 including 13 species that are threatened with extinction, which are found in the Baturité  
31 Massif. The aim of this study was to investigate the frequency and diversity of  
32 enterobacteria in wild birds and to determine their susceptibility to antimicrobials.  
33 Cloacal swab samples were collected from 50 individuals of 28 different species,  
34 including the Ceara Gnatheter (*Conopophaga cearae*) and Red-necked Tanager  
35 (*Tangara cyanocephala cearensis*), which are classified as vulnerable (VU) by the  
36 Brazilian Ministry of the Environment. A total of 55 isolates belonging to 14 different  
37 species of Enterobacteriaceae were identified. Among these, *Pantoea agglomerans* and  
38 *Escherichia coli* were the most prevalent species with isolation rates of 36% and 26%,  
39 respectively. The highest rate of antimicrobial resistance found was to ampicillin  
40 (41.8%), followed by nalidixic Acid (36.3%) and amoxicillin associated with clavulanic

41 acid (32.7%). The drugs with the best efficacy were tobramycin (96.4%), ciprofloxacin  
42 (92.6%) and tetracycline (90.9%). Multidrug resistance was observed in 23.5% of the  
43 analyzed strains. This research provides important information about the composition of  
44 the cloacal microbiota of wild birds in Mulungu, Brazil, as well as their health status. In  
45 addition, these results demonstrate that they harbor multidrug-resistant strains of  
46 Enterobacteriaceae.

## 47 **Introduction**

48 It is estimated that the Caatinga biome is home to 548 species of birds, which are  
49 distributed in 74 families and represent 28.6% of the total number of species recorded in  
50 Brazil [1]. The Ceará State, Brazil, is located in this biome, which has dry landscapes as  
51 its main geographic feature. Nonetheless, it presents other striking phytophysiognomies,  
52 such as coastal forests, often associated with extensive mangroves, Cerrado fragments,  
53 in addition to remnants of Atlantic Forest and Forest Amazon embedded in the semiarid  
54 zone [2, 3, 4, 5], as occurs in the enclaves of humid forest occurring in the Baturité  
55 Massif [6]. The Baturité Massif has been under strong anthropogenic pressure and since  
56 its original occupation it has suffered severe environmental degradation caused by  
57 deforestation, fires, introduction of exotic species, dismemberment of sites, predatory  
58 hunting and growth of urban centers, which have been important factors for the  
59 alteration of the local biota [7]. In addition, it is home to 13 bird species that are  
60 classified as threatened in the Red List of the Brazilian Ministry of the Environment [8].  
61 Therefore, the Baturité Massif is a priority area for avian conservation in Northeastern  
62 Brazil [9].

63 The environmental degradation can promote notable negative consequences on  
64 wildlife [10]. Environmental pollution is one of the anthropogenic actions that puts the  
65 conservation of avifauna at risk, mainly on aspects related to the dissemination of  
66 pathogens that are important for animal and public health, such as Salmonella and other  
67 enteropathogens [11, 12]. Furthermore, free-ranging birds may come into contact with  
68 residues of antibiotics or resistant microorganisms when exposed to contaminants in the  
69 environment in which they live [13, 14, 15]. This may affect the health of birds,  
70 considering that factors such as ingestion of antibiotics and infection by pathogenic  
71 organisms may alter the microbiota of birds [16, 17, 18].

72 Several studies with free-living birds have shown that they may carry strains of  
73 bacteria from the Enterobacteriaceae family with resistance to multiple antimicrobials

74 [19, 20, 21]. Over several decades, antimicrobial resistance has become a global clinical  
75 and public health threat against the effective treatment of common infections caused by  
76 resistant pathogens, resulting in treatment failure and increased mortality [22]. The  
77 development of bacterial resistance can be explained by the natural evolution of  
78 microorganisms. However, the widespread and misuse of antibacterial agents in humans  
79 and animals has accelerated this process [22]. In recent years, substantial evidence has  
80 been provided linking the high presence of antimicrobial-resistant bacteria in the  
81 environment with anthropogenic sources [23, 24]. In this context, there is a growing  
82 interest in researches involving the environment, including wildlife, in order to better  
83 understand the effects of pollution and antimicrobial resistance derived from  
84 anthropogenic impacts in ecosystems [25, 26, 27].

85 Anthropogenic effects on wildlife are poorly investigated, and the extent to  
86 which animal populations contribute to the spread of antibiotic resistance is still  
87 unknown. Therefore, considering that there are few studies investigating the contact that  
88 free-living birds have with multidrug-resistant enterobacteria in the Ceará State, which  
89 are generally limited to a few species, greater elucidation is needed [28, 29, 15, 30].

90 Hence, this study aimed to investigate the presence of enterobacteria in cloacal  
91 swab samples of wild birds captured in the city of Mulungu, Ceará, Brazil, and to  
92 determine the phenotypic profile of antimicrobial sensitivity of the isolates.

## 93 **Material and methods**

### 94 **Characterization of the Study Area**

95 This study was authorized by the Brazilian Institute for the Environment and  
96 Renewable Natural Resources (IBAMA) with SISBIO protocol number 31847-6 and  
97 approved by the Ethics Committee for the Use of Animals of the State University of  
98 Ceará (Protocol number 4832011/2014).

99 The study was carried out in the city of Mulungu, Ceará, which is located in the  
100 Baturité Massif that contains 16 cities: Aratuba, Baturité, Canindé, Capistrano, Charity,  
101 Guaramiranga, Mulungu, Redenção, Pacoti, Palmacia, Acarape, Barreira, Aracoiaba,  
102 Guaiúba, Maranguape and Itapiúna. Within the region known as the Baturité Massif, an  
103 Environmental Protection Area (APA) is located at an approximate distance of 120  
104 kilometers from the state capital, Fortaleza. This APA presents its highest peak at 1115  
105 meters in altitude and is composed by tropical pluvial subdeciduous forest and pluvio-  
106 nebular subevergreen forest (average annual temperatures of 24° to 26° with average

107 annual rainfall of 1,737.5 millimeters and with hot sub-humid and humid tropical  
108 conditions) with trees up to 30 meters high, river springs and waterfalls. This region  
109 show a marked contrast to the surrounding semiarid backwoods (sertão) in the middle of  
110 a hot dry region. It has high anthropogenic activity, such as agriculture, livestock and  
111 urban growth, and presents mostly altered vegetation [31, 32, 33].

## 112 Sample collection

113 The capture of birds was conducted for 3 months (october, november and  
114 december 2019) with the aid of 4 mist nets (Ecotone Mist nets - 1030/12-nailon; length:  
115 12 cm; height: 3.2m; mesh: 30x30cm; denier: 110/2; 4 bags, fixed with rods at the  
116 ends).

117 The nets were placed 20 cm above the ground in linear transects in the forest.  
118 These were opened at dawn and closed at dusk (7:00 am to 5:00 pm) and were checked  
119 every 20 minutes to remove the captured birds.

120 The species were identified according to the *Avis Brasilis* field guide [34] and  
121 by consulting the list of birds in Brazil made available by the Brazilian Committee for  
122 Ornithological Records - CBRO [35].

123 Biological samples were obtained using sterile cloacal swabs, which were stored  
124 in Stuart medium at room temperature, transported and sent within 48 hours to the  
125 Ornithological Studies Laboratory, State University of Ceará (LABEO/UECE) for  
126 further microbiological processing. After sampling, individuals were marked by  
127 clipping a secondary feather from the right wing before being released back to the wild.

## 128 Microbiological procedure

129 Once at the Ornithological Studies Laboratory (LABEO), samples were  
130 transferred from Stuart media to 5 mL of 1% Peptone Water (Kasvi®) and were  
131 cultured. The incubation conditions were standardized at 37°C/24h for all the steps of  
132 the microbiological procedure. Aliquots of 0.5mL were collected from the peptone  
133 water samples and transferred to tubes containing Brain-Heart Infusion (Kasvi®) (BHI)  
134 and Selenite-Cystine (Kasvi®) (SC) enrichment broths. In addition, aliquots of 0.05mL  
135 were collected and transferred to Rappaport-Vassiliadis broth (Kasvi®) (RP). After  
136 incubation, a loopful was collected from each broth and streaked on plates containing  
137 Brilliant Green agar (Himedia®), Salmonella-Shigella agar (Himedia®) and  
138 MacConkey agar (Kasvi®), following incubation. Different colonies were collected  
139 from each plate and were inoculated into tubes containing Triple Sugar Iron Agar

140 (Kasvi®). To identify the enterobacteria, biochemical tests were used, including SIM  
141 Medium (Himedia®), lysine-decarboxylase (LIA) (Kasvi®), ornithine-decarboxylase  
142 (Himedia®), methyl red (VM), Voges-Proskauer (VP) (Himedia®), Urea (Dynamic  
143 Formula®), Simmons Citrate Agar (Himedia®), Arginine Decarboxylase (Exodus  
144 Cientifica®), Malonate Broth (Himedia®), Lactose (Merck®), Sucrose (Dinâmica®),  
145 Mannitol (Dinâmica®), Arabinose (Dinâmica®), Raffinose (Dinâmica®), Rhamnose  
146 (Dinâmica®), Sucrose (Dinâmica®), Dulcitol (Dinâmica® ®), Adonitol (Dinâmica®),  
147 Inositol (Sigma®) and Sorbitol (Sigma®) [36].

#### 148 Antimicrobial susceptibility profile

149 The isolates were submitted to antimicrobial susceptibility test using the Kirby-  
150 Bauer disk diffusion technique [37], and the inhibition zones were compared to the  
151 standards established by the Clinical and Laboratory Standards Institute-CLSI [38].  
152 Eleven antimicrobials of 7 pharmacological classes were tested: Quinolones (Nalidixic  
153 Acid, 30µg); Fluroquinolones (Ciprofloxacin, 5µg); Aminoglycosides (Gentamicin,  
154 10µg and Tobramycin, 10µg); Tetracyclines (Tetracycline, 30µg); Macrolides  
155 (Azithromycin, 15µg); Sulfonamides (Sulfamethoxazole + Trimethoprim, 25 µg); Beta-  
156 lactams (Penicillin: Ampicillin, 10 µg and Amoxicillin + Clavulanic Acid 10 µg,  
157 Cephalosporins: Ceftriaxone, 30 µg and Carbapenems: Meropenem 10µg); (All  
158 antimicrobials from Oxoid Ltd., Cambridge, UK confirm brand\*). Isolates that  
159 expressed resistance or intermediate phenotypes were interpreted as resistant. Bacteria  
160 were considered resistant to multiple drugs (RMD) when resistance occurred to at least  
161 three classes of antibiotics [39]. The *Escherichia coli* ATCC 25922 strain was used as a  
162 control sample. To perform the test, isolates were cultured in tubes containing 5 mL of  
163 Brain-heart Infusion broth (BHI), and placed in bacteriological incubator for 24 hours at  
164 37°C. Subsequently, aliquots of the broth were seeded onto MacConkey agar plates and  
165 again incubated. Afterwards, two to three colonies were selected and placed in 5mL  
166 tubes of saline solution. Then, a swab was moistened in the turbid saline solution  
167 (which contained a turbidity of 0.5 according to the Mcfarland Nephelometric scale)  
168 and streaked on the surface of a plate containing Mueller-Hinton agar (Kasvi®), to  
169 which antimicrobial discs were placed. After the plates were incubated at 37°C for 24h,  
170 the inhibition zones were measured and results were interpreted as sensitive or resistant.

#### 171 Results

172 During the study, a total of 50 birds of 28 different species distributed in 13  
 173 families were captured (Table 1). The most frequent species was Pectoral Sparrow  
 174 (*Arremon taciturnus*), in a total of 5 individuals, followed by the occurrence of Yellow-  
 175 bellied Elaenia (*Elaenia flavogaster*) and Ruddy Ground-Dove (*Columbina talpacoti*),  
 176 both with 4 individuals. Two rare species classified as vulnerable (VU) were also  
 177 collected, which were the Ceara Gnateater (*Conopophaga cearae*) and the Red-necked  
 178 Tanager (*Tangara cyanocephala cearensis*) [8].  
 179

**Table 1. List of bird species captured in the city of Mulungu, Ceará, Brazil**

| Family           | Common and scientific name                                           | Captured animals |
|------------------|----------------------------------------------------------------------|------------------|
| Thraupidae       | Red-necked Tanager ( <i>Tangara cyanocephala cearensis</i> )         | 2                |
|                  | Burnished-buff Tanager ( <i>Stilpnia cayana</i> )                    | 1                |
|                  | Bananaquit ( <i>Coereba flaveola</i> )                               | 2                |
|                  | Palm Tanager ( <i>Thraupis palmarum</i> )                            | 3                |
|                  | Guira Tanager ( <i>Hemithraupis guira</i> )                          | 1                |
|                  | Orange-headed Tanager ( <i>Thlypopsis sordida</i> )                  | 1                |
| Tyrannidae       | Gray Elaenia ( <i>Myiopagis caniceps</i> )                           | 2                |
|                  | Mouse-colored Tyrannulet ( <i>Phaeomyias murina</i> )                | 1                |
|                  | Short-crested Flycatcher ( <i>Myiarchus ferox</i> )                  | 1                |
|                  | Yellow-bellied Elaenia ( <i>Elaenia flavogaster</i> )                | 4                |
| Columbidae       | Gray-fronted Dove ( <i>Leptotila rufaxilla</i> )                     | 2                |
|                  | Ruddy Ground-Dove ( <i>Columbina talpacoti</i> )                     | 4                |
| Trochilidae      | Ruby-topaz Hummingbird ( <i>Chrysolampis mosquitus</i> )             | 1                |
|                  | Fork-tailed Woodnymph ( <i>Thalurania furcata</i> )                  | 2                |
|                  | Rufous-breasted Hermit ( <i>Glaucis hirsutus</i> )                   | 3                |
| Passerellidae    | Pectoral Sparrow ( <i>Arremon taciturnus</i> )                       | 5                |
| Dendrocolaptidae | Straight-billed Woodcreeper ( <i>Dendroplex picus</i> )              | 2                |
|                  | Planalto Woodcreeper ( <i>Dendrocolaptes platyrostris</i> )          | 1                |
|                  | Lafresnaye's Woodcreeper ( <i>Xiphorhynchus guttatoides eytoni</i> ) | 1                |
|                  | Red-billed Scythebill ( <i>Campylorhamphus trochilirostris</i> )     | 1                |
| Turdidae         | Pale-breasted Thrush ( <i>Turdus leucomelas</i> )                    | 1                |
|                  | Rufous-bellied Thrush ( <i>Turdus rufiventris</i> )                  | 2                |
| Furnariidae      | Pale-legged Hornero ( <i>Furnarius leucopus</i> )                    | 2                |
| Picidae          | Green-barred Woodpecker ( <i>Colaptes melanochloros</i> )            | 1                |

|                |                                                                    |    |
|----------------|--------------------------------------------------------------------|----|
| Conopophagidae | Ceara Gnateater ( <i>Conopophaga cearae</i> )                      | 1  |
| Icteridae      | Variable Oriole ( <i>Icterus pyrrhopterus</i> )                    | 1  |
| Thamnophilidae | Great Antshrike ( <i>Taraba major</i> )                            | 1  |
| Hirundinidae   | Southern Rough-winged Swallow ( <i>Stelgidopteryx ruficollis</i> ) | 1  |
| Total          | 28                                                                 | 50 |

180

181 A total of 55 strains distributed in 14 different bacterial species were detected in  
182 the analyzed samples. The prevalence of positive birds for at least one bacterial species  
183 was 52.0%. *Pantoea agglomerans* and *Escherichia coli* were the most prevalent ones,  
184 occurring in 36.0% (18/50) and 26% (13/50) of the investigated birds. *Serratia rubidaea*  
185 was the third most isolated bacterial species, followed by *Hafnia alvei*, which  
186 presented isolation rates of 14.0% (7/50) and 10.0% (5/50), respectively (Table 2).

187

188

189

190

191

192

193

194

195

196

197

198

199

200

201

202

203

204

205

206

207

208



**Table 2- Absolute and relative frequencies of enterobacteria per bird family in cloacal samples of wild birds captured from October to December 2019 in the city of Mulungu, Ceará, Brazil**

| Isolated Enterobacteriaceae    | Total number of birds (n=50) | Absolute and relative frequencies |           |           |           |           |            |            |           |            |            |            |            |           |
|--------------------------------|------------------------------|-----------------------------------|-----------|-----------|-----------|-----------|------------|------------|-----------|------------|------------|------------|------------|-----------|
|                                |                              | THR (n=10)                        | TYR (n=8) | COL (n=6) | TRO (n=6) | PAS (n=5) | DEN (n=5)  | TUR (n=3)  | FUR (n=2) | PIC (n=1)  | CON (n=1)  | ICT (n=1)  | THA (n=1)  | HIR (n=1) |
| <i>Pantoea agglomerans</i>     | 18 (36.0%)                   | 2 (20.0%)                         | 1 (25.5%) | 2 (33.3%) | 1 (16.6%) | 3 (60.0%) | 3 (60.0%)  | 1 (33.3%)  | 1 (50.0%) | 1 (100.0%) | 1 (100.0%) | 1 (100.0%) | 1 (100.0%) | 0 (0%)    |
| <i>Escherichia coli</i>        | 13 (26.0%)                   | 1 (10.0%)                         | 1 (25.5%) | 3 (50.0%) | 0 (0%)    | 2 (40.0%) | 3 (60.0%)  | 2 (66.6%)  | 1 (50.0%) | 0 (0%)     | 0 (0%)     | 0 (0%)     | 0 (0%)     | 0 (0%)    |
| <i>Serratia rubidaea</i>       | 7 (14.0%)                    | 0 (0%)                            | 1 (25.5%) | 2 (33.3%) | 0 (0%)    | 1 (20.0%) | 1 (20.0%)  | 1 (33.3%)  | 0 (0%)    | 1 (100.0%) | 0 (0%)     | 0 (0%)     | 0 (0%)     | 0 (0%)    |
| <i>Hafnia alvei</i>            | 5 (10.0%)                    | 1 (10.0%)                         | 0 (0%)    | 0 (0%)    | 0 (0%)    | 1 (20.0%) | 2 (40.0%)  | 1 (33.3%)  | 0 (0%)    | 0 (0%)     | 0 (0%)     | 0 (0%)     | 0 (0%)     | 0 (0%)    |
| <i>Enterobacter gergoviae</i>  | 2 (4.0%)                     | 0 (0%)                            | 0 (0%)    | 0 (0%)    | 0 (0%)    | 1 (20.0%) | 0 (0%)     | 1 (33.3%)  | 0 (0%)    | 0 (0%)     | 0 (0%)     | 0 (0%)     | 0 (0%)     | 0 (0%)    |
| <i>Edwardsiella tarda</i>      | 2 (4.0%)                     | 0 (0%)                            | 0 (0%)    | 0 (0%)    | 0 (0%)    | 0 (0%)    | 1 (20.0%)  | 0 (0%)     | 0 (0%)    | 0 (0%)     | 0 (0%)     | 0 (0%)     | 1 (100.0%) | 0 (0%)    |
| <i>Klebsiella pneumoniae</i>   | 1 (2.0%)                     | 0 (0%)                            | 0 (0%)    | 0 (0%)    | 0 (0%)    | 1 (20.0%) | 0 (0%)     | 0 (0%)     | 0 (0%)    | 0 (0%)     | 0 (0%)     | 0 (0%)     | 0 (0%)     | 0 (0%)    |
| <i>Proteus vulgaris</i>        | 1 (2.0%)                     | 0 (0%)                            | 0 (0%)    | 0 (0%)    | 0 (0%)    | 0 (0%)    | 0 (0%)     | 1 (33.3%)  | 0 (0%)    | 0 (0%)     | 0 (0%)     | 0 (0%)     | 0 (0%)     | 0 (0%)    |
| <i>Proteus mirabilis</i>       | 1 (2.0%)                     | 0 (0%)                            | 0 (0%)    | 0 (0%)    | 0 (0%)    | 0 (0%)    | 0 (0%)     | 0 (0%)     | 0 (0%)    | 0 (0%)     | 1 (100.0%) | 0 (0%)     | 0 (0%)     | 0 (0%)    |
| <i>Cronobacter sakazakii</i>   | 1 (2.0%)                     | 0 (0%)                            | 0 (0%)    | 1 (16.6%) | 0 (0%)    | 0 (0%)    | 0 (0%)     | 0 (0%)     | 0 (0%)    | 0 (0%)     | 0 (0%)     | 0 (0%)     | 0 (0%)     | 0 (0%)    |
| <i>Enterobacter cloacae</i>    | 1 (2.0%)                     | 0 (0%)                            | 0 (0%)    | 0 (0%)    | 0 (0%)    | 0 (0%)    | 1 (20.0%)  | 0 (0%)     | 0 (0%)    | 0 (0%)     | 0 (0%)     | 0 (0%)     | 0 (0%)     | 0 (0%)    |
| <i>Arizona spp</i>             | 1 (2.0%)                     | 0 (0%)                            | 0 (0%)    | 0 (0%)    | 0 (0%)    | 0 (0%)    | 1 (20.0%)  | 0 (0%)     | 0 (0%)    | 0 (0%)     | 0 (0%)     | 0 (0%)     | 0 (0%)     | 0 (0%)    |
| <i>Yersinia enterocolitica</i> | 1 (2.0%)                     | 0 (0%)                            | 0 (0%)    | 0 (0%)    | 0 (0%)    | 0 (0%)    | 1 (20.0%)  | 0 (0%)     | 0 (0%)    | 0 (0%)     | 0 (0%)     | 0 (0%)     | 0 (0%)     | 0 (0%)    |
| <i>Shigella spp</i>            | 1 (2.0%)                     | 0 (0%)                            | 0 (0%)    | 0 (0%)    | 0 (0%)    | 0 (0%)    | 0 (0%)     | 0 (0%)     | 1 (50.0%) | 0 (0%)     | 0 (0%)     | 0 (0%)     | 0 (0%)     | 0 (0%)    |
| Positive samples               | 26 (52.0%)                   | 2 (20.0%)                         | 2 (25.0%) | 4 (66.6%) | 1 (16.6%) | 4 (80.0%) | 5 (100.0%) | 3 (100.0%) | 1 (50.0%) | 1 (100.0%) | 1 (100.0%) | 1 (100.0%) | 1 (100.0%) | 0 (0%)    |

THR= Thraupidae, TYR= Tyrannidae, COL=Columbidae, TRO=Trochilidae, PAS= Passerellidae, DEN=Dendrocolaptidae, TUR=Turdidae, FUR=Furnariidae, PIC=Picidae, CON= Conopophagidae, ICT= Icteridae, THA= Thamnophilidae, HIR= Hirundinidae

210

211

212

213



214 Negative samples were obtained from birds of the Hirundinidae family. On the  
 215 other hand, all species of the Dendrocolaptidae, Turdidae, Picidae, Conopophagidae,  
 216 Icteridae and Thamnophilidae family had at least one bacterial isolate. In the  
 217 Trochilidae family, there was only one (1/6 species) bird that presented bacterial  
 218 growth, which was a Rufous-breasted Hermit (*Glaucis hirsutus*) that was positive for  
 219 *Pantoea agglomerans*. Another family with a low number of positive birds was  
 220 Thraupidae that presented only two birds positive for enterobacteria (2/10 species). An  
 221 Orange-headed Tanager (*Thlypopsis sordida*) was positive for *Hafnia alvei* and *Pantoea*  
 222 *agglomerans*, whereas a Bananaquit (*Coereba flaveola*) was positive for *Pantoea*  
 223 *agglomerans* and *Escherichia coli*. The Tyrannidae family had the same number of  
 224 positive birds (2/8 species), two individuals of Yellow-bellied Elaenia (*Elaenia*  
 225 *flavogaster*) from which *Pantoea agglomerans* and *Serratia rubidaea* were isolated  
 226 from one sample and *Escherichia coli* was isolated from the other. Lafresnaye's  
 227 Woodcreeper (*Xiphorhynchus guttatoides eytoni*) was the species with the highest  
 228 number of isolated enterobacteria (*Enterobacter cloacae*, *Serratia rubidaea*,  
 229 *Escherichia coli*, *Edwardsiella tarda*, *Hafnia alvei* and *Arizona* spp). The Red-necked  
 230 Tanager species (*Tangara cyanocephala* subsp. *cearensis*) classified as vulnerable (VU)  
 231 had no isolates, while the species Ceara Gnateater (*Conopophaga cearae*) classified as  
 232 vulnerable (VU) was positive for *Proteus mirabilis* and *Pantoea agglomerans* (Table 3).

**Table 3. Bacterial species isolated from free-living wild birds captured in the city of Mulungu, Ceará, Brazil**

| Family                                 | Common and scientific name                                   | Isolated species of Enterobacteriaceae           |
|----------------------------------------|--------------------------------------------------------------|--------------------------------------------------|
| Thraupidae                             | Red-necked Tanager ( <i>Tangara cyanocephala cearensis</i> ) | -                                                |
|                                        | Burnished-buff Tanager ( <i>Stilpnia cayana</i> )            | -                                                |
|                                        | Bananaquit ( <i>Coereba flaveola</i> )                       | -                                                |
|                                        | Palm Tanager ( <i>Thraupis palmarum</i> )                    | -                                                |
|                                        | Red-necked Tanager ( <i>Tangara cyanocephala cearensis</i> ) | -                                                |
|                                        | Palm Tanager ( <i>Thraupis palmarum</i> )                    | -                                                |
|                                        | Palm Tanager ( <i>Thraupis palmarum</i> )                    | -                                                |
|                                        | Guira Tanager ( <i>Hemithraupis guira</i> )                  | -                                                |
|                                        | Orange-headed Tanager ( <i>Thlypopsis sordida</i> )          | <i>Hafnia alvei</i> / <i>Pantoea agglomerans</i> |
| Bananaquit ( <i>Coereba flaveola</i> ) | <i>Pantoea agglomerans</i> / <i>Escherichia coli</i>         |                                                  |
| Tyrannidae                             | Gray Elaenia ( <i>Myiopagis caniceps</i> )                   | -                                                |
|                                        | Gray Elaenia ( <i>Myiopagis caniceps</i> )                   | -                                                |
|                                        | Mouse-colored Tyrannulet ( <i>Phaeomyias murina</i> )        | -                                                |

|                  |                                                                      |                                                                                                                                                         |
|------------------|----------------------------------------------------------------------|---------------------------------------------------------------------------------------------------------------------------------------------------------|
|                  | Short-crested Flycatcher ( <i>Myiarchus ferox</i> )                  | -                                                                                                                                                       |
|                  | Yellow-bellied Elaenia ( <i>Elaenia flavogaster</i> )                | <i>Pantoea agglomerans</i> / <i>Serratia rubidaea</i>                                                                                                   |
|                  | Yellow-bellied Elaenia ( <i>Elaenia flavogaster</i> )                | -                                                                                                                                                       |
|                  | Yellow-bellied Elaenia ( <i>Elaenia flavogaster</i> )                | <i>Escherichia coli</i>                                                                                                                                 |
|                  | Yellow-bellied Elaenia ( <i>Elaenia flavogaster</i> )                | -                                                                                                                                                       |
| Columbidae       | Gray-fronted Dove ( <i>Leptotila rufaxilla</i> )                     | <i>Pantoea agglomerans</i> / <i>Serratia rubidaea</i>                                                                                                   |
|                  | Gray-fronted Dove ( <i>Leptotila rufaxilla</i> )                     | -                                                                                                                                                       |
|                  | Ruddy Ground-Dove ( <i>Columbina talpacoti</i> )                     | <i>Escherichia coli</i>                                                                                                                                 |
|                  | Ruddy Ground-Dove ( <i>Columbina talpacoti</i> )                     | <i>Pantoea agglomerans</i> /<br><i>Escherichia coli</i>                                                                                                 |
|                  | Ruddy Ground-Dove ( <i>Columbina talpacoti</i> )                     | -                                                                                                                                                       |
|                  | Ruddy Ground-Dove ( <i>Columbina talpacoti</i> )                     | <i>Escherichia coli</i> / <i>Cronobacter sakazakii</i> / <i>Serratia rubidaea</i>                                                                       |
| Trochilidae      | Ruby-topaz Hummingbird ( <i>Chrysolampis mosquitus</i> )             | -                                                                                                                                                       |
|                  | Woodnymph ( <i>Thalurania furcata</i> )                              | -                                                                                                                                                       |
|                  | Rufous-breasted Hermit ( <i>Glaucis hirsutus</i> )                   | -                                                                                                                                                       |
|                  | Rufous-breasted Hermit ( <i>Glaucis hirsutus</i> )                   | -                                                                                                                                                       |
|                  | Rufous-breasted Hermit ( <i>Glaucis hirsutus</i> )                   | <i>Pantoea agglomerans</i>                                                                                                                              |
|                  | Woodnymph ( <i>Thalurania furcata</i> )                              | -                                                                                                                                                       |
| Passerellidae    | Pectoral Sparrow ( <i>Arremon taciturnus</i> )                       | <i>Escherichia coli</i> / <i>Pantoea agglomerans</i>                                                                                                    |
|                  | Pectoral Sparrow ( <i>Arremon taciturnus</i> )                       | <i>Escherichia coli</i>                                                                                                                                 |
|                  | Pectoral Sparrow ( <i>Arremon taciturnus</i> )                       | <i>Pantoea agglomerans</i> / <i>Hafnia alvei</i> / <i>Serratia rubidaea</i> / <i>Klebsiella pneumoniae</i>                                              |
|                  | Pectoral Sparrow ( <i>Arremon taciturnus</i> )                       | <i>Enterobacter gergoviae</i> / <i>Pantoea agglomerans</i>                                                                                              |
|                  | Pectoral Sparrow ( <i>Arremon taciturnus</i> )                       | -                                                                                                                                                       |
| Dendrocolaptidae | Straight-billed Woodcreeper ( <i>Dendroplex picus</i> )              | <i>Escherichia coli</i>                                                                                                                                 |
|                  | Straight-billed Woodcreeper ( <i>Dendroplex picus</i> )              | <i>Pantoea agglomerans</i>                                                                                                                              |
|                  | Planalto Woodcreeper ( <i>Dendrocolaptes platyrostris</i> )          | <i>Hafnia alvei</i> / <i>Pantoea agglomerans</i>                                                                                                        |
|                  | Lafresnaye's Woodcreeper ( <i>Xiphorhynchus guttatoides eytoni</i> ) | <i>Enterobacter cloacae</i> / <i>Serratia rubidaea</i> / <i>Escherichia coli</i> / <i>Edwardsiella tarda</i> / <i>Hafnia alvei</i> / <i>Arizona</i> spp |
|                  | Red-billed Scythebill ( <i>Campylorhamphus trochilirostris</i> )     | <i>Pantoea agglomerans</i> / <i>Yersinia enterocolitica</i> / <i>Escherichia coli</i>                                                                   |
| Turdidae         | Pale-breasted Thrush ( <i>Turdus leucomelas</i> )                    | <i>Proteus vulgaris</i>                                                                                                                                 |
|                  | Rufous-bellied Thrush ( <i>Turdus rufiventris</i> )                  | <i>Pantoea agglomerans</i> / <i>Serratia rubidaea</i> / <i>Escherichia coli</i> / <i>Enterobacter gergoviae</i>                                         |
|                  | Rufous-bellied Thrush ( <i>Turdus rufiventris</i> )                  | <i>Hafnia alvei</i> / <i>Escherichia coli</i>                                                                                                           |
| Furnariidae      | Pale-legged Hornero ( <i>Furnarius leucopus</i> )                    | <i>Pantoea agglomerans</i> / <i>Shigella</i> spp./ <i>Escherichia coli</i>                                                                              |
|                  | Pale-legged Hornero ( <i>Furnarius leucopus</i> )                    | -                                                                                                                                                       |
| Picidae          | Green-barred Woodpecker ( <i>Colaptes melanochloros</i> )            | <i>Pantoea agglomerans</i> / <i>Serratia rubidaea</i>                                                                                                   |
| Conopophagidae   | Ceara Gnateater ( <i>Conopophaga cearae</i> )                        | <i>Proteus mirabilis</i> / <i>Pantoea</i>                                                                                                               |

|                | <i>agglomerans</i>                                                 |                                                                 |
|----------------|--------------------------------------------------------------------|-----------------------------------------------------------------|
| Icteridae      | Variable Oriole ( <i>Icterus pyrrhopterus</i> )                    | <i>Pantoea agglomerans</i>                                      |
| Thamnophilidae | Great Antshrike ( <i>Taraba major</i> )                            | <i>Pantoea agglomerans/Edwardsiella tarda/Serratia rubidaea</i> |
| Hirundinidae   | Southern Rough-winged Swallow ( <i>Stelgidopteryx ruficollis</i> ) | -                                                               |

233

234

235

236

237

238

239

240

241

242

243

244

245

246

247

248

249

250

251

252

253

254

255

256

257

258

259

260

261

Considering the total of evaluated strains, the highest rate of antimicrobial resistance occurred to ampicillin 47.3% (26/55). Even after the exclusion of intrinsic resistance (*Klebsiella pneumonia* and *Hafnia alvei*), the rate of 41.8 % (23 strains) was still the highest result. After excluding cases of intrinsic resistance (*Hafnia alvei*), nalidixic acid with a rate of 36.3% (20/55) and amoxicillin associated with Clavulanic Acid with 32.7% (18/55), were the second and third antimicrobials with the highest resistance rates. Tobramycin, ciprofloxacin and tetracycline were the drugs that showed the best efficacy with rates of 96.4%, 92.6% and 90.9% respectively. Meropenem and Gentamicin also performed well (85.5% and 81.8% efficacy, respectively). Considering *E. coli*, the highest resistance rate was also detected to ampicillin, 53.8% (7/13). In contrast, all strains were sensitive to Ciprofloxacin. Regarding the *Cronobacter sakazakii* and *Enterobacter cloacae* strains, both showed resistance only to Nalidixic Acid (Table 4).

**Table 4. Absolute and relative frequencies of antimicrobial-resistant enterobacteria isolated from cloacal swab samples of wild birds captured from October to December 2019 in the city of Mulungu, Ceará, Brazil**

| Enterobacteriaceae                      | GEN        | AZI        | TOB      | AMP         | CEF       | AMO+AC. CLA | CIP       | TET       | SUL       | AC. NAL    | MER       |
|-----------------------------------------|------------|------------|----------|-------------|-----------|-------------|-----------|-----------|-----------|------------|-----------|
|                                         | n (%)      | n (%)      | n (%)    | n (%)       | n (%)     | n (%)       | n (%)     | n (%)     | n (%)     | n (%)      | n (%)     |
| <i>Pantoea agglomerans</i> , n=18       | 4 (22.2%)  | 5 (27.7%)* | -        | 7 (38.9%)   | 3 (16.6%) | 9 (50%)     | 1 (5.5%)  | -         | -         | 7 (38.9%)  | 2 (11.1%) |
| <i>Escherichia coli</i> , n=13          | 1 (7.7%)   | 2 (15.4%)* | 1 (7.7%) | 7 (53.8%)   | 2 (15.4%) | 2 (15.4%)   | -         | 1 (7.7%)  | 2 (15.4%) | 2 (15.4%)  | 1 (7.7%)  |
| <i>Serratia rubidae</i> , n=7           | 2 (28.6%)  | 2 (28.6%)* | -        | 4 (57.1%)   | 2 (28.6%) | 1 (14.3%)   | 1 (14.3%) | 1 (14.3%) | -         | 3 (42.8%)  | 2 (28.6%) |
| <i>Hafnia alvei</i> , n=5               | -          | 2 (40.0%)* | -        | 2 (40%)*    | 1 (20%)   | 2 (40%)*    | -         | 1 (20%)   | 2 (40%)   | 2 (40%)    | -         |
| <i>Enterobacter gergoviae</i> , n=2     | 1 (50%)    | -          | -        | 1 (50%)     | -         | 1 (50%)     | -         | -         | -         | -          | -         |
| <i>Edwardsiella tarda</i> , n=2         | -          | 2 (100%)*  | -        | 1 (50%)     | -         | 2 (100%)    | 1 (50%)   | -         | -         | -          | -         |
| <i>Klebsiella pneumonia</i> , n=1       | 1 (100%)   | -          | -        | 1 (100%)*   | 1 (100%)  | 1 (100%)    | 1 (100%)  | -         | -         | 1 (100%)   | 1 (100%)  |
| <i>Proteus vulgaris</i> , n=1           | -          | 1 (100%)*  | -        | -           | 1 (100%)  | 1 (100%)    | -         | 1 (100%)* | -         | 1 (100%)   | 1 (100%)  |
| <i>Proteus mirabilis</i> , n=1          | -          | 1 (100%)*  | -        | -           | 1 (100%)  | -           | -         | -         | -         | 1 (100%)   | -         |
| <i>Cronobacter sakazakii</i> , n=1      | -          | -          | -        | -           | -         | -           | -         | -         | -         | 1 (100%)   | -         |
| <i>Enterobacter cloacae</i> , n=1       | -          | -          | -        | -           | -         | -           | -         | -         | -         | 1 (100%)   | -         |
| <i>Arizona</i> spp, n=1                 | -          | -          | -        | 1 (100%)    | -         | 1 (100%)    | -         | -         | -         | -          | -         |
| <i>Yersinia enterocolitica</i> , n=1    | -          | 1 (100%)*  | -        | 1 (100%)    | -         | -           | -         | -         | -         | -          | -         |
| <i>Shigella</i> spp, n=1                | 1 (100%)   | 1 (100%)   | 1 (100%) | 1 (100%)    | -         | -           | 1 (100%)  | 1 (100%)  | 1 (100%)  | 1 (100%)   | 1 (100%)  |
| Acquired resistance                     | 10 (18.2%) | 1 (1.8)    | 2 (3.6%) | 23 (41.8%)  | 11 (20%)  | 18 (32.7%)  | 5 (9.1%)  | 4 (7.8)   | 5 (9.1%)  | 20 (36.3%) | 8 (14.5)  |
| Total resistance (acquired + intrinsic) | 10 (18.2%) | 17 (30.9)* | 2 (3.6%) | 26 (47.3%)* | 11 (20%)  | 20 (36.3%)  | 5 (9.1%)  | 5 (9.1%)* | 5 (9.1%)  | 20 (36.3%) | 8 (14.5)  |

GEN-Gentamicin; AZI-Azithromycin; TOB-Tobramycin; AMP-Ampicillin; CEF-Ceftriaxone; AMO+AC.CLA- Amoxicillin associated with Clavulanic Acid; CIP-Ciprofloxacin; TET-Tetracycline; SUL- Sulfonamide; AC. NAL- Nalidixic Acid; MER- Meropenem; \*- Intrinsic Resistance

267 Among the birds classified as vulnerable (VU) by the list of the Official National  
 268 List of Fauna Species Endangered with Extinction [8], it was not possible to detect  
 269 resistance in samples collected from the Red-necked Tanager (*Tangara cyanocephala*  
 270 *cearensis*), since there was no isolation of any bacteria. However, the *Proteus mirabilis*  
 271 strain that was isolated from a Ceara Gnateater (*Conopophaga cearae*) was resistant to  
 272 azithromycin, ceftriaxone and nalidixic acid. In addition, the *Pantoea agglomerans*  
 273 strain that was isolated from the same individual was resistant to eight out of twelve  
 274 tested antibiotics (gentamicin, nalidixic acid, ceftriaxone, amoxicillin + clavulanic acid,  
 275 ciprofloxacin, ampicillin, ciprofloxacin and meropenem), which correspond to five of  
 276 the seven antimicrobial classes.

277 As expected, when considering the bacterial species that have intrinsic resistance  
 278 mechanisms, resistance to at least one of the tested antimicrobials was observed in all of  
 279 the strains. However, when considering only acquired resistance, 10 isolates (18.2%)  
 280 were sensitive to all of the investigated drugs. Multidrug resistance (acquired cases) was  
 281 observed in 13 isolates (23.5%), and three strains were resistant to seven antibiotics.  
 282 From the total of 13 *Escherichia coli* strains, 2/13 (7.7%) presented multidrug resistance  
 283 and 4/13 (30.8%) of the strains were sensitive to all of the studied antimicrobials (Table  
 284 5).

**Table 5. Absolute and relative frequencies of resistance to multiple drugs of Enterobacteriaceae strains isolated from cloacal swabs from free-living birds captured in the city of Mulungu, Ceará, Brazil**

| Number of antibiotic classes | Frequency of resistant <i>Escherichia coli</i> (%) | Resistant enterobacteria     |                                             |
|------------------------------|----------------------------------------------------|------------------------------|---------------------------------------------|
|                              |                                                    | Only acquired resistance (%) | Total resistance (intrinsic + acquired) (%) |
| 0                            | 4 (30.8%)                                          | 10 (18.2%)                   | -                                           |
| 1                            | 5 (38.4%)                                          | 20 (36.4%)                   | 10 (18.2%)                                  |
| 2                            | 2 (15.4%)                                          | 12 (21.9%)                   | 22 (40%)                                    |
| 3                            | 1 (7.7%)                                           | 5 (9.1%)                     | 13 (23.7%)                                  |
| 4                            | -                                                  | 2 (3.6%)                     | 3 (5.4%)                                    |
| 5                            | 1 (7.7%)                                           | 3 (5.4%)                     | 3 (5.4%)                                    |
| 6                            | -                                                  | -                            | 1 (1.9%)                                    |
| 7                            | -                                                  | 3 (5.4%)                     | 3 (5.4%)                                    |

285  
 286  
 287

288

## 289 **Discussion**

290 In this study, more than half of the samples were positive to some of the  
291 investigated enterobacteria. Despite the isolation of fourteen different species of  
292 bacteria, birds were not necessarily suffering from any pathological condition. In  
293 addition to the low frequency of isolation, some of these microorganisms may occur  
294 naturally in these birds, considering that these strains have been isolated previously  
295 from healthy birds either in the wild or in cages [40, 41, 42, 43, 44, 45, 30]. Species of  
296 the Enterobacteriaceae family, *Escherichia coli* in particular, do not belong to the  
297 intestinal microbiota of granivorous pet birds, because feed composed exclusively of  
298 seeds has been shown to provoke an inhibitory effect of this bacterial species [46]. In  
299 this sense, the detection of Enterobacteriaceae in cloacal samples of granivorous birds  
300 should be observed with caution, as it suggests favorable conditions for the  
301 development of potential pathologies [47]. However, it is important to highlight that the  
302 bird species that were captured in this study have an omnivorous diet. This may explain  
303 the natural presence of enterobacteria, since the occurrence of these microorganisms in  
304 the digestive tract is influenced by the composition of their nutrition [46]. Other factors  
305 may also have influenced the isolation of these bacteria, such as direct or indirect  
306 contact with domestic animals, as well as environmental contamination by human  
307 action. In the natural environment in which they live, several species of enterobacteria  
308 also occur, as they are ubiquitous, in soil or water. Thus, Enterobacteriaceae have been  
309 isolated mainly from omnivorous, piscivorous and healthy carnivore birds [46, 48, 49,  
310 50, 51].

311 The most prevalent bacterial species isolated from birds in this study was  
312 *Pantoea agglomerans*. This microorganism can rarely cause infections, while it  
313 normally acts as a commensal species that colonizes the normal intestinal microbiota.  
314 Biodiversity studies report the isolation of *Pantoea agglomerans* in the microbiota of  
315 several plants and insects [52, 53], which serve as a food source for several of the bird  
316 species that were captured. *Escherichia coli* was also among the most isolated  
317 microorganisms (23.2%) and is likewise an ubiquitous organism, which can be found in  
318 soil, water and vegetation [54, 55]. Although its presence does not necessarily mean a  
319 sign of illness, on some occasions, such as when they acquire virulence genes, this  
320 bacterium can cause pathological problems in humans and animals, including birds [41].

321 The prevalence of *E. coli* in studies involving free-ranging birds is quite varied. Saviolli  
322 [56] describes the presence of the microorganism in 60.0% of samples from  
323 Magnificent Frigatebird (*Fregata magnificens*) from the coast of the State of São Paulo.  
324 Vilela et al. [57] investigated this microorganism in fecal samples of House Sparrows  
325 (*Passer domesticus*) that lived around farms in the State of Pernambuco and found  
326 lower percentages (13.2%). Callaway et al. [58] analyzed cloacal swab samples from  
327 376 migratory birds, which included Brown-Headed Cowbird (*Molothrus ater*),  
328 Common Grackle (*Quiscalus quiscula*) and Cattle Egret (*Bubulcus ibis*), and found  
329 even lower rates, 3.7% (14/376).

330 *Serratia rubidea* was the third most isolated species of bacteria. It is considered  
331 an important human pathogen as a common agent of nosocomial infections mainly of  
332 the urinary tract [59]. Diseases caused by *Serratia* in birds are uncommon but can occur  
333 mostly in an opportunistic manner in immunocompromised birds due to stress in  
334 captivity, inappropriate weather conditions, parasitic diseases, among other causes [60,  
335 61]. Free-living birds can either acquire this microorganism from the contaminated  
336 environment in which they live and may act as disseminators. Spena et al. [62] isolated  
337 *Serratia rubidea* from oral swab samples of Eurasian Thick-knee (*Burhinus*  
338 *oedicnemus*) and associated this finding with a diet composed of invertebrates found in  
339 the feces of ruminants. This bacterial species has also been reported to be isolated from  
340 lake waters in Poland, which was occupied by Great Cormorant (*Phalacrocorax carbo*).  
341 Researchers have associated this finding with the leaching of feces and excreta during  
342 rains leading this and other species of enterobacteria into the lake [63].

343 The other enterobacteria that occurred less frequently in the analyzed samples  
344 can also occasionally cause damage to health and reports have already been described in  
345 the scientific literature involving free-range or domestic birds. In addition to sharing  
346 virulence factors with other enteropathogens, such as *Escherichia coli*, *Hafnia alvei* has  
347 been reported to cause serious infections in laying hens [64, 65]. Miniero Davies et al.  
348 [66] described an outbreak of mortality associated with *E. tarda* affecting fish, domestic  
349 ducks and a wild heron that shared a lake located on a farm in the state of São Paulo,  
350 Brazil. Davies et al. [67] described *Klebsiella pneumoniae* expressing virulence and  
351 antibiotic resistance genes in psittacine and passerine birds from illegal trade.  
352 *Cronobacter sakazakii* has been reported in broilers with clinical signs causing high  
353 mortality and decreased egg production [68]. *Proteus* sp. are also potentially pathogenic  
354 for birds as the cause of foot injuries and involvement of the respiratory system causing



355 air sacculitis and caseous pneumonia in cases of immunosuppression [69]. Bacteria  
356 from the *Arizona* group have often been isolated from feces of adult chickens and  
357 turkeys but have also been reported to occur in wild birds, such as the Canadian crane  
358 [70, 71]. However, more serious occurrences have been reported in industrial birds,  
359 such as mortality in turkeys, as well as clinical signs of Salmonellosis and omphalitis in  
360 broiler chickens [72, 1].

361 It is always more expected to detect cases of antimicrobial resistance in birds  
362 raised in captivity than those that live in the wild. In addition to the possibility of  
363 inappropriate use of antibiotics, this may occur when birds have greater contact with  
364 other animals that possess and disseminate resistant strains [73, 74]. However, our  
365 research showed cases of free-living bird strains with relevant antimicrobial resistance  
366 rates, mainly involving ampicillin, nalidixic acid and amoxicillin associated with  
367 clavulanic acid. Some studies involving free-living birds has also reported resistance to  
368 these three antibiotics in isolates of enterobacteria with varying rates. Carreira [75]  
369 researched samples of cloacal swabs from free-living birds captured in the Metropolitan  
370 region of Fortaleza, Brazil and observed that the acquired resistance rates of amoxicillin  
371 associated with clavulanic acid, as well as nalidixic acid, were lower than the results  
372 found in this study. Tsubokura et al. [76] analyzed *Escherichia coli* isolates from the  
373 feces of several migratory bird species collected in the coastal region of Japan found  
374 that less than 10% of the samples were resistant to ampicillin. These same researchers  
375 used the feces of 54-day-old Hyline chicks and found the resistance to ampicillin to be  
376 approximately 39.0%. These variations can often be attributed to the conditions found  
377 in different habitats [77], as demonstrated by several studies that measure resistance  
378 levels in isolates from birds under different conditions or captured in different  
379 environments [78, 24, 79, 80, 81].

380 The rate of resistance to meropenem detected in free-living birds in this research  
381 should also be highlighted (14.5%). Several studies involving wild birds, free-living or  
382 not, as well as domestic birds, present lower rates of resistance to this drug or none at all  
383 [82, 83, 30, 84, 85]. However, a more relevant point is the fact that this drug is a high  
384 cost carbapenemic with restricted use to hospitals in Brazil. In addition, it is a last resort  
385 for the treatment of infections and is widely prescribed to human patients with septic  
386 conditions in intensive care of severe infections by Gram-negative hospital pathogens,  
387 including Enterobacteriaceae [86, 87, 88]. Although the recommendations for the use of  
388 this drug are restricted, the reservoirs of these organisms are increasing, not only in

389 hospitals, but also in the community and the environment. An important new source of  
390 resistance development of such organisms is observed in livestock, companion animals  
391 and wildlife [89].

392 Concerning the total number of isolated enterobacterial strains (23.6%) and  
393 specifically *Escherichia coli* (15.4%), worrisome rates of multidrug resistance were  
394 observed, considering that these are Gram-negative bacteria from free-living animals.  
395 Other studies have also demonstrated the occurrence of multidrug resistance of bacteria  
396 isolated from cloacal swabs in free-living birds [90, 85]. However, it is not so simple to  
397 obtain a proper comparison of data from other studies, since there are few published  
398 articles specifically involving free-living birds and isolates of enterobacteria in general  
399 from cloacal swabs. One of these studies involves Gray-breasted Parakeets (*Pyrrhura*  
400 *griseipectus*), whose total bacterial isolates presented a lower multidrug resistance rate  
401 (11.1%) [30]. Concerning *Escherichia coli*, it is possible to observe that the results in  
402 relation to multidrug resistance are the most varied. However, it is possible to find  
403 similar rates [15], percentages lower than 5.4% or higher than 23.1% [26, 84].

404 Densely populated urban areas are historically seen as hotspots for antibiotic  
405 resistant bacteria [91, 92] but microorganisms with these characteristics associated with  
406 humans have been described in non-clinical environments, such as in remote areas of  
407 the planet, far from direct anthropogenic pressure, apparently free from exposure to  
408 antibiotics, as in regions of the Amazon, Bolivia and Antarctica. It is suspected that this  
409 resistance may have been caused by the existence in these regions of military bases,  
410 domestic animals, water, fishing boats, scientific expeditions and/or on-board tourism  
411 [93, 94, 95, 96, 97]. Although it is important to emphasize that the cause of antibiotic  
412 resistance may not always be related to environmental pressures caused by man, as is  
413 the case of those that are naturally induced by microorganisms that produce natural  
414 antibiotics [98].

415 The considerable resistance rates detected in isolates from birds captured in  
416 Mulungu, more particularly those tested with ampicillin, amoxicilin+clavulunate,  
417 meropenem and nalidixic acid, may indicate that some contact with anthropogenic  
418 residues has occurred. Thus, we can consider that wild birds included in our study may  
419 be working as indicators of environmental contamination. In this context, we found that  
420 free-living birds can be considered victims of the environment in which they live,  
421 acquiring multidrug resistant bacteria. At some point, this condition can harm the  
422 conservation of species, or they may act as reservoirs of resistant bacteria [97, 99, 100,

423 101]. Thus, the emergence and evolution of antibiotic resistance among pathogenic  
424 bacteria represent a serious public health issue on a global scale [102, 103].

425

## 426 **Conclusion**

427 This study revealed that the investigated wild free-living birds harbor a diverse  
428 cloacal microbiota concerning the Enterobacteriaceae family. The phenotypic analysis of  
429 the isolates revealed the occurrence of bacterial resistance to several of the  
430 antimicrobials tested. Among these, the resistance rates to ampicillin and nalidixic acid  
431 can be considered high, since these isolates originated from free-living animals, which  
432 naturally suffer a lower selective pressure by antibiotics than domestic ones. The  
433 percentage of resistance found to meropenem (14.5%) was also higher than normally  
434 expected, since it is a drug with restricted use in hospitals. A relevant multidrug  
435 resistance rate was also detected in this study (23.5%), and this shows that birds  
436 associated with local extinction risk, such as Ceara Gnateater (*Conopophaga cearae*),  
437 are also being affected.

438 Although this research did not investigate the direct or indirect relationship of  
439 wild birds in the Region of Mulungu-CE with sources of contamination, such as sewage  
440 water, dumps, crops, soil and domestic or wild animals, it is possible to assume that  
441 they could have some contact with contaminating agents, which explains the multidrug  
442 resistance rates detected in the cloacal microbiota isolates. Furthermore, birds that have  
443 been infected by these microorganisms may also be carrying resistant bacteria to other  
444 wild birds or to domestic animals.

445

## 446 **Author Contributions**

447 **Conceptualization:** Antonio Jackson Forte Beleza, Régis Siqueira de Castro Teixeira

448 **Data curation:** Antonio Jackson Forte Beleza

449 **Formal analysis:** William Cardoso Maciel, Arianne Silva Carreira

450 **Funding acquisition:** Antonio Jackson Forte Beleza, Adson Ribeiro Marques, Carlos  
451 Henrique Guedes Nogueira

452 **Investigation:** Régis Siqueira de Castro Teixeira, Antonio Jackson Forte Beleza, Adson  
453 Ribeiro Marques, Leandro Rodrigues Ribeiro, Neilton Monteiro Pascoal Filho

454 **Methodology:** Régis Siqueira de Castro Teixeira, Antonio Jackson Forte Beleza, Bruno

455 Pessoa Lima

456 **Project administration:** Antonio Jackson Forte Beleza

457 **Resources:** Antonio Jackson Forte Beleza

458 **Supervision:** William Cardoso Maciel

459 **Validation:** William Cardoso Maciel, Isaac Neto Goes da Silva

460 **Writing ± review & editing:** Ruben Horn Vasconcelos, Régis Siqueira de Castro

461 Teixeira, Antonio Jackson Forte Beleza.

## 462 **Acknowledgments**

463           The authors would like to thank the Coordination for the Improvement of Higher  
464 Education Personnel (CAPES) for the financial support. We are also grateful for the  
465 fundamental logistical support given by Mr. Saulo Rocha from Fazenda Haras Claro,  
466 who provided accommodation for the entire team of researchers responsible for field  
467 activities.

## 468 **References**

469

470 1. Pacheco, GO. Isolation of *Arizona hinshawii* from broilers, breeding animals,  
471 incubation waste and components of poultry rations in Mexico. In: Proceedings of  
472 29th Western Poultry Disease Conference, Acapulco, Mexico, 22-25 April 1980.  
473 Cooperative Extension, University., 1980. p. 215-218.

474

475 2. Ab'Sáber, Aziz Nacib. "Nordeste sertanejo: a região semi-árida mais povoada do  
476 mundo." *Estudos avançados* 13. 1999: 60-68. doi: <https://doi.org/10.4000/nrt.1879>

477

478 3. Farias JA. *História do Ceará*. 6ª ed. Fortaleza: Armazém da Cultura. 2012.

479

480 4. Studart GC. *Geografia do Ceará*. Fortaleza: Expressão Gráfica. 2010.

481

482 5. IBGE – INSTITUTO BRASILEIRO DE GEOGRAFIA E ESTATÍSTICA. 2014.  
483 Estados. Ceará. Disponível em [http://www.ibge.gov.br/estadosat/per](http://www.ibge.gov.br/estadosat/perfil.php?lang=&sigla=ce)  
484 [fil.php?lang=&sigla=ce](http://www.ibge.gov.br/estadosat/perfil.php?lang=&sigla=ce). Acesso em março de 2014.

485

486 6. Quinet Y, Hites N, de Biseau D'Hauteville JC, Oliveira T S, & Araujo FS. *Formigas*  
487 (*Hymenoptera Formicidae*) da serra de Baturité, Ceará. in: T. S. Oliveira e F. S.  
488 Araújo (eds.). *Biodiversidade e conservação da biota na serra de Baturité, Ceará*.  
489 Fortaleza: Edições UFC, Coelce. 2007. PP. p.251-271.

- 490  
491 7. Cavalcante AMB. A Serra de Baturité. Fortaleza: Edições Livro técnico, 2005. p.84.  
492  
493 8. Instituto Chico Mendes de Conservação da Biodiversidade (2018) Livro Vermelho  
494 da Fauna Brasileira Ameaçada de Extinção: Volume I/1. ed. Brasília: ICMBio, 492  
495 p. (impresso). Acompanha Pen Card contendo: v.2. Mamíferos - v.3. Aves - v.4.  
496 Répteis - v.5. Anfíbios - v.6. Peixes – v.7 Invertebrados.  
497  
498 9. Nunes FP, Lopes I T. Aves da Serra de Baturité: Guia Fotográfico. Ceará; Aquasis.  
499 p.180. 2015.  
500  
501 10. Biondo D, Pletsch JÁ, Guzzo GB. Impactos da ação antrópica em indivíduos da  
502 fauna silvestre de Caxias do Sul e região: uma abordagem ex situ. Revista Brasileira  
503 de Biociências. 2019; v. 17, n. 1. Disponível em  
504 <http://www.ufrgs.br/seerbio/ojs/index.php/rbb/article/view/4183>  
505  
506 11. Silva MA, Marvulo MF, Mota RA, Silva JC. A importância da ordem Ciconiiformes  
507 na cadeia epidemiológica de *Salmonella* spp. para a saúde pública e a conservação  
508 da diversidade biológica. Pesquisa Veterinária Brasileira, v. 30, p. 573-580, 2010.  
509 <https://doi.org/10.1590/S0100-736X2010000700011>  
510  
511 12. De Moraes ABC, Ribeiro MG, Listoni FP. Enteropatógenos de potencial zoonótico  
512 identificados em aves silvestres. Veterinária e Zootecnia. 2019. v. 26, p. 1-16.  
513 <https://doi.org/10.35172/rvz.2019.v26.404>  
514  
515 13. Waldenström J, Broman T, Carlsson I, Hasselquist D, Achterberg RP, Wagenaar JA,  
516 Olsen B. Prevalence of *Campylobacter jejuni*, *Campylobacter lari*, and  
517 *Campylobacter coli* in different ecological guilds and taxa of migrating birds.  
518 Applied and Environmental Microbiology. 2002. v. 68, n. 12, p. 5911-5917.  
519 <https://doi.org/10.1128/AEM.68.12.5911-5917.2002>  
520  
521 14. Maul JD, Gandhi JP, Farris JL. Community-level physiological profiles of cloacal  
522 microbes in songbirds (Order: Passeriformes): variation due to host species, host  
523 diet, and habitat. Microbial ecology. 2005. v. 50, n. 1, p. 19-28.  
524 <https://doi.org/10.1007/s00248-004-0076-9>  
525  
526 15. Machado DN, Lopes ES, Albuquerque AH, Horn RV, Bezerra WGA, Siqueira RAS,  
527 Cardoso WM. Isolation and Antimicrobial Resistance Profiles of Enterobacteria  
528 from Nestling Grey-Breasted Parakeets (*Pyrrhura Griseipectus*). Brazilian Journal  
529 of Poultry Science. 2018. v.20, p. 103-110. <https://doi.org/10.1590/1806-9061-2017-0551>  
530  
531  
532 16. Palmgren H, Sellin M, Bergström S, Olsen B. Enteropathogenic bacteria in  
533 migrating birds arriving in Sweden. Scandinavian Journal of Infectious Diseases.  
534 1997. v. 29, n. 6, p. 565-568. <https://doi.org/10.3109/00365549709035895>  
535  
536 17. Gabriel I, Mallet S, Sibille P. La microflore digestive des volailles: facteurs de  
537 variation et conséquences pour l'animal. PRODUCTIONS ANIMALES-PARIS-

- 538 INSTITUT NATIONAL DE LA RECHERCHE AGRONOMIQUE-. 2005. v. 18, n.  
539 5, p. 309. <https://doi.org/10.20870/productions-animales.2005.18.5.3535>  
540
- 541 18. Saullu J. (2009). Saúde intestinal das aves e suas interações. 2007.  
542
- 543 19. Santos, T., Silva, N., Igrejas, G., Rodrigues, P., Micael, J., Rodrigues, T., ... &  
544 Poeta, P. Dissemination of antibiotic resistant *Enterococcus* spp. and *Escherichia*  
545 *coli* from wild birds of Azores Archipelago. *Anaerobe*. 2013. v. 24, p. 25-31.  
546 <https://doi.org/10.1016/j.anaerobe.2013.09.004>  
547
- 548 20. Smith S, Wang J, Fanning S, McMahon BJ. Antimicrobial resistant bacteria in wild  
549 mammals and birds: a coincidence or cause for concern?. *Irish Veterinary Journal*.  
550 2014. v.67, n.8, p. 1-3. <https://doi.org/10.1186/2046-0481-67-8>  
551
- 552 21. Stedt, J., Bonnedahl, J., Hernandez, J., McMahon, B. J., Hasan, B., Olsen, B., ... &  
553 Waldenström, J. Antibiotic resistance patterns in *Escherichia coli* from gulls in nine  
554 European countries. *Infection Ecology and Epidemiology*. 2014. v. 4, n. 215, p.1-10.  
555 <https://doi.org/10.3402/iee.v4.21565>  
556
- 557 22. WHO. 2014. Antimicrobial Resistance: Global Report on Surveillance. Geneva:  
558 World Health Organization 2014.  
559
- 560 23. Wellington EM, Boxall A B, Cross P, Feil EJ, Gaze WH, Hawkey PM, Johnson-  
561 Rollings AS, Jones DL, Lee NM, Otten W, Thomas CM, Williams AP. The role of  
562 the natural environment in the emergence of antibiotic resistance in gram-negative  
563 bacteria. *Lancet Infectious Diseases*. 2013. 13(2), 155–165.  
564 [https://doi.org/10.1016/S1473-3099\(12\)70317-1](https://doi.org/10.1016/S1473-3099(12)70317-1)  
565
- 566 24. Atterby C, Ramey AM, Hall GG, Järhult J, Börjesson S, Bonnedahl J. Increased  
567 prevalence of antibiotic-resistant *E. coli* in gulls sampled in Southcentral Alaska is  
568 associated with urban environments. *Infection ecology & epidemiology*. 2016. v. 6,  
569 n. 1, p. 32334. <https://doi.org/10.3402/iee.v6.32334>  
570
- 571 25. Arnold KE, Williams NJ, Bennett M. ‘Disperse abroad in the land’: the role of  
572 wildlife in the dissemination of antimicrobial resistance. *Biology Letters*. 2016. v.  
573 12, n. 8, p. 20160137. <https://doi.org/10.1098/rsbl.2016.0137>  
574
- 575 26. Carroll D, Wang J, Fanning S, McMahon BJ. Antimicrobial resistance in wildlife:  
576 implications for public health. *Zoonoses and public health*. 2015. v. 62, n. 7, p. 534-  
577 542. <https://doi.org/10.1111/zph.12182>  
578
- 579 27. Huijbers PM, Blaak H, De Jong MC, Graat EA, Vandenbroucke-Grauls CM, De  
580 Roda Husman AM. Role of the environment in the transmission of antimicrobial  
581 resistance to humans: a review. *Environmental science & technology*. 2015. v. 49, n.  
582 20, p. 11993-12004. <https://doi.org/10.1021/acs.est.5b02566>  
583
- 584 28. Tavares SS. Aspectos biológicos, fisiológicos e patológicos de carcarás (*Caracara*  
585 *plancus*, miller, j. f., 1777) capturados na área do aeroporto internacional pinto  
586 martins, Fortaleza-CE. Dissertação (Mestrado em Ciências Veterinárias)



- 587 Universidade Estadual do Ceará, 2014. Disponível em:  
588 [http://www.uece.br/ppgcwv/wp-](http://www.uece.br/ppgcwv/wp-content/uploads/sites/6/2019/08/SamuelSalgado_Disserta%C3%A7%C3%A3o.pdf)  
589 [content/uploads/sites/6/2019/08/SamuelSalgado\\_Disserta%C3%A7%C3%A3o.pdf](http://www.uece.br/ppgcwv/wp-content/uploads/sites/6/2019/08/SamuelSalgado_Disserta%C3%A7%C3%A3o.pdf)  
590
- 591 29. Mendonça SV. Caracterização hematológica, bioquímica, morfométrica e  
592 microbiológica de falcões peregrinos (*Falco peregrinus*) de vida livre. Dissertação  
593 (Mestrado em Ciências Veterinárias) Universidade Estadual do Ceará, 2015.  
594 Disponível em:  
595 [https://sucupira.capes.gov.br/sucupira/public/consultas/coleta/trabalhoConclusao/vie](https://sucupira.capes.gov.br/sucupira/public/consultas/coleta/trabalhoConclusao/viewTrabalhoConclusao.jsf?popup=true&id_trabalho=2407537)  
596 [wTrabalhoConclusao.jsf?popup=true&id\\_trabalho=2407537](https://sucupira.capes.gov.br/sucupira/public/consultas/coleta/trabalhoConclusao/viewTrabalhoConclusao.jsf?popup=true&id_trabalho=2407537)  
597
- 598 30. Beleza AJF, Maciel WC, Carreira AS, Marques AR, Nunes FP, Raso TF, Teixeira  
599 RS. Antimicrobial susceptibility profile of enterobacteria isolated from wild grey-  
600 breasted parakeets (*Pyrrhura griseipectus*). Pesquisa Veterinária Brasileira. 2021. v.  
601 41. <https://doi.org/10.1590/1678-5150-PVB-6696>  
602
- 603 31. Oliveira TS et al. Histórico dos impactos antrópicos e aspectos geoambientais da  
604 serra de Barturité, Ceará. In: OLIVEIRA, T. S.; ARAÚJO, F. S. (Eds.) Eds.).  
605 Diversidade e conservação da biota da serra de Baturité, Ceará. Fortaleza: Edições  
606 UFC; COELCE, 2007. p. 17 70.  
607
- 608 32. IPECE. Perfil básico municipal. Fortaleza, 2012. Disponível  
609 em: <[http://www.ipece.ce.gov.br/publicacoes/perfil\\_basico/pbm2012/Guaramiranga](http://www.ipece.ce.gov.br/publicacoes/perfil_basico/pbm2012/Guaramiranga.pdf)  
610 [.pdf](http://www.ipece.ce.gov.br/publicacoes/perfil_basico/pbm2012/Guaramiranga.pdf)>. Acesso em: 27 set. 2021.  
611
- 612 33. FUNDAÇÃO CEARENSE DE METEOROLOGIA E RECURSOS HÍDRICOS -  
613 FUNCEME: “Dados pluviométricos do Ceará”. Disponível em  
614 <[http://www.funceme.br/index.php/areas/23onitoramento/meteorolC3%B3gico/633-](http://www.funceme.br/index.php/areas/23onitoramento/meteorolC3%B3gico/633-calend%C3%A1rio-das-chuvas)  
615 [-calend%C3%A1rio-das-chuvas](http://www.funceme.br/index.php/areas/23onitoramento/meteorolC3%B3gico/633-calend%C3%A1rio-das-chuvas)> Acessado em outubro de 2015.  
616
- 617 34. Sigrist T. Guia de Campo Avis Brasilis – Avifauna Brasileira. Avis Brasilis, São  
618 Paulo, 2014.  
619
- 620 35. Pacheco JF, Silveira LF, Aleixo A, Agne CE, Bencke GA, Bravo GA, Brito, GRR,  
621 Cohn-Haft M, Maurício GN, Naka LN, Olmos F, Posso S, Lees AC, Figueiredo LFA,  
622 Carrano E, Guedes RC, Cesari E, Franz I, Schunck F, Piacentini VQ. Annotated  
623 checklist of the birds of Brazil by the Brazilian Ornithological Records Committee—  
624 second edition. Ornithology Research. 2021 v. 29, n. 2, p. 94-105.  
625 <https://doi.org/10.1007/s43388-021-00058-x>.  
626
- 627 36. Koneman EW, Procop GW, Church DL, Hall GS, Janda WM, Schreckenb P.  
628 Enterobacteriaceae. *Diagnóstico Microbiológico: Texto e Atlas Colorido*. 7. Ed.  
629 (pag. 230-290) Rio de Janeiro: Guanabara Koogan. 2018.  
630
- 631 37. Bayer AW, Kirby WMM, Sherris JC, Turck M. Antibiotic susceptibility testing by a  
632 standardized single disc method. Am J clin pathol. 1966 v. 45, n. 4, p. 493-496.  
633
- 634 38. Clinical and Laboratory Standards Institute (CLSI), 2019. Performance Standards  
635 for Antimicrobial Susceptibility Testing. 29th ed. Document M100-S29.



636

637 39. Magiorakos AP, Srinivasan A, Carey RB, Carmeli Y, Falagas ME, Giske CG,  
638 Harbarth S, Hindler JF, Kahlmeter G, Olsson-Liljequist B, Paterson DL, Rice LB,  
639 Stelling J, Struelens MJ, Vatopoulos A, Weber JT, Monnet DL. Multidrug-resistant,  
640 extensively drug-resistant and pandrug-resistant bacteria: an international expert  
641 proposal for interim standard definitions for acquired resistance. *Clinical  
642 microbiology and infection*. 2012. v. 18, n. 3, p. 268-281.  
643 <https://doi.org/10.1111/j.1469-0691.2011.03570.x>

644

645 40. Santos HF, Flôres ML, Lara VM, Silva MS, Battisti L, Lovato LT. Cloacal  
646 microbiota identification and evaluation of the antimicrobial resistance in captive  
647 cracids from Rio Grande do Sul, Brazil. *Pesquisa Veterinária Brasileira*. 2010. v. 30,  
648 n. 12, p. 1077-1082, 2010. <https://doi.org/10.1590/S0100-736X2010001200013>

649

650 41. Lopes EDS, Maciel WC, De Albuquerque ÁH, Machado DN, Bezerra WDA,  
651 Vasconcelos RH, Teixeira RDC. Prevalence and antimicrobial resistance profile of  
652 enterobacteria isolated from psittaciformes of illegal wildlife trade. *Acta Scientiae  
653 Veterinariae*. 2015. v. 43.

654

655 42. Murugaiyan J, Krueger K, Roesler U, Weinreich J, Schierack P. Assessment of  
656 species and antimicrobial resistance among Enterobacteriaceae isolated from  
657 mallard duck faeces. *Environmental monitoring and assessment*. 2015. v. 187, n. 3,  
658 p. 1-11. <https://doi.org/10.1007/s10661-015-4346-4>

659

660 43. Horn RV, Cardoso WM, Lopes ES, Teixeira RS, Albuquerque ÁH, Rocha-e-Silva  
661 RC, Bezerra WG. Identification and antimicrobial resistance of members from the  
662 Enterobacteriaceae family isolated from canaries (*Serinus canaria*). *Pesquisa  
663 Veterinária Brasileira*. 2015. v. 35, p. 552-556. [https://doi.org/10.1590/S0100-  
664 736X2015000600011](https://doi.org/10.1590/S0100-736X2015000600011)

665

666 44. Vaz FF, Serafini PP, Locatelli-Dittrich R, Meurer R, Durigon EL, Araújo JD, Raso  
667 TF. Survey of pathogens in threatened wild red-tailed Amazon parrot (*Amazona  
668 brasiliensis*) nestlings in Rasa Island, Brazil. *brazilian journal of microbiology*.  
669 2017. v. 48, p. 747-753. <https://doi.org/10.1016/j.bjm.2017.03.004>

670

671 45. Beleza AJF, Maciel WC, Carreira AS, Bezerra WG, Carmo CC, Havt A, Teixeira  
672 RS. Detection of Enterobacteriaceae, antimicrobial susceptibility, and virulence  
673 genes of *Escherichia coli* in canaries (*Serinus canaria*) in northeastern Brazil.  
674 *Pesquisa Veterinária Brasileira*. 2019. v. 39, p. 201-208.  
675 <https://doi.org/10.1590/1678-5150-PVB-5829>

676

677 46. Glünder G. Influence of diet on the occurrence of some bacteria in the intestinal  
678 flora of wild and pet birds. *DTW. Deutsche Tierärztliche Wochenschrift*. 2002. v.  
679 109, n. 6, p. 266-270. PMID: 12125172.

680

681 47. Di Francesco CE, Todisco G, Montani A, Profeta F, Di Provvido A, Foschi G,  
682 Marsilio F. Reproductive disorders in domestic canaries (*Serinus canarius  
683 domesticus*): A retrospective study on bacterial isolates and their antimicrobial

- 684 resistance in Italy from 2009 to 2012. *Vet. Ital.* 2018. v. 54, p. 169-174. doi:  
685 10.12834/VetIt.955.4952.2  
686
- 687 48. Bangert RL, Ward ACS, Stauber EH, Cho BR, Widders PR. A survey of the aerobic  
688 bacteria in the feces of captive raptors. *Avian Diseases.* 1988. p. 53-62.  
689 <https://doi.org/10.2307/1590948>  
690
- 691 49. Aruji Y, Tamura K, Sugita S, Adachi Y. Intestinal microflora in 45 crows in Ueno  
692 Zoo and the in vitro susceptibilities of 29 *Escherichia coli* isolates to 14  
693 antimicrobial agents. *Journal of veterinary medical science.* 2004. v. 66, n. 10, p.  
694 1283-1286. <https://doi.org/10.1292/jvms.66.1283>  
695
- 696 50. Dobbin G, Hariharan H, Daoust PY, Hariharan S, Heaney S, Coles M, Muckle CA.  
697 Bacterial flora of free-living double-crested cormorant (*Phalacrocorax auritus*)  
698 chicks on Prince Edward Island, Canada, with reference to enteric bacteria and  
699 antibiotic resistance. *Comparative immunology, microbiology and infectious*  
700 *diseases.* 2005. v. 28, n. 1, p. 71-82. <https://doi.org/10.101/j.cimid.2004.08.001>  
701
- 702 51. Gibbs PS, Kasa R, Newbrey JL, Petermann SR, Wooley RE, Vinson HM, Reed W.  
703 Identification, antimicrobial resistance profiles, and virulence of members from the  
704 family Enterobacteriaceae from the feces of yellow-headed blackbirds  
705 (*Xanthocephalus xanthocephalus*) in North Dakota. *Avian diseases.* 2007. v. 51, n.  
706 3, p. 649-655. [https://doi.org/10.1637/0005-2086\(2007\)51\[649:IARPAV\]2.0.CO;2](https://doi.org/10.1637/0005-2086(2007)51[649:IARPAV]2.0.CO;2)  
707
- 708 52. Segado-Arenas A, Alonso-Ojembarrena A, Lubián-López SP, García-Tapia AM.  
709 *Pantoea agglomerans*: ¿ un nuevo patógeno en la unidad de cuidados intensivos  
710 neonatales?: a new pathogen at the neonatal intensive care unit?. *Archivos*  
711 *argentinos de pediatría.* 2012. v. 110, n. 4, p. e77-e79.  
712 <http://dx.doi.org/10.5546/aap.2012.e77>  
713
- 714 53. Walterson AM, Stavrinides J. *Pantoea*: insights into a highly versatile and diverse  
715 genus within the Enterobacteriaceae. *FEMS microbiology reviews.* 2015. v. 39, n. 6,  
716 p. 968-984. <https://doi.org/10.1093/femsre/fuv027>  
717
- 718 54. Ewers CATS, Bethe A, Semmler T, Guenther S, Wieler LH. Extended-spectrum  $\beta$ -  
719 lactamase-producing and AmpC-producing *Escherichia coli* from livestock and  
720 companion animals, and their putative impact on public health: a global perspective.  
721 *Clinical Microbiology and Infection.* 2012. v. 18, n. 7, p. 646-655.  
722 <https://doi.org/10.1111/j.1469-0691.2012.03850.x>  
723
- 724 55. Riley LW. Pandemic lineages of extraintestinal pathogenic *Escherichia coli*.  
725 *Clinical Microbiology and Infection.* 2014. v. 20, n. 5, p. 380-390.  
726 <https://doi.org/10.1111/1469-0691.12646>  
727
- 728 56. Saviolli JY. Pesquisa e Caracterização de *Escherichia coli* patogênica (*E. coli*  
729 produtora de toxina Shiga-STEC; *E. coli* aviária patogênica-APEC) de fragatas  
730 (*Fregata magnificens*) da Costa do Estado de São Paulo. 2010. Tese de Doutorado.  
731 Universidade de São Paulo. Disponível em:  
732 <https://www.teses.usp.br/teses/disponiveis/10/10133/tde-10082010-143759/en.php>

733

734 57. Vilela SM, Pinheiro Júnior JW, Silva JS, Pace FD, Silveira WD, Saukas TN, Mota  
735 RA. Research of Salmonella spp. and evaluation of pathogenicity, cytotoxicity of  
736 Escherichia coli isolates proceeding from sparrows (*Passer domesticus*). Pesquisa  
737 Veterinária Brasileira. 2012. v. 32, p. 931-935. [https://doi.org/10.1590/S0100-](https://doi.org/10.1590/S0100-736X2012000900019)  
738 [736X2012000900019](https://doi.org/10.1590/S0100-736X2012000900019)

739

740 58. Callaway TR, Edrington TS, Nisbet DJ. Isolation of *Escherichia coli* O157: H7 and  
741 *Salmonella* from migratory brown-headed cowbirds (*Molothrus ater*), common  
742 grackles (*Quiscalus quiscula*), and cattle egrets (*Bubulcus ibis*). Foodborne  
743 pathogens and disease. 2014. v. 11, n. 10, p. 791-794.  
744 <https://doi.org/10.1089/fpd.2014.1800>

745

746 59. Menezes EA, Cezafar FC, Andrade MDS, Rocha MVADP, Cunha FA.  
747 Frequência de Serratia sp em Infecções Urinárias de pacientes internados na Santa  
748 Casa de Misericórdia em Fortaleza. Revista da Sociedade Brasileira de Medicina  
749 Tropical. 2004. v. 37, n. 1, p. 70-71. [https://doi.org/10.1590/S0037-](https://doi.org/10.1590/S0037-86822004000100020)  
750 [86822004000100020](https://doi.org/10.1590/S0037-86822004000100020)

751

752 60. Fudge AM. Diagnosis and treatment of avian bacterial diseases. Sem. Avian Exotic  
753 Pet Medicine. 2001. 10:3-11.

754

755 61. Guimarães MB. Passeriformes (pássaro, canário, saíra, gralha). CUBAS, ZS;  
756 SILVA, JCR; CATÃO-DIAS, JL Tratado de animais selvagens. São Paulo. 2006.  
757 Roca, p. 324-337.

758

759 62. Spena MT, Foti M, Fisichella V, Mascetti A, Zafarana MA, Colnaghi M, Grasso R.  
760 Physiological and potentially pathogenic microbial flora in stone curlew (*Burhinus*  
761 *oediacnemus*), southeastern Sicily. Journal of Wildlife and Biodiversity. 2020. v. 4, n.  
762 3, p. 24-36. <https://dx.doi.org/10.22120/jwb.2020.128364.1148>

763

764 63. Wiśniewska H, Niewolak S, Korzeniewska E, Filipkowska Z. Enterobacteriaceae  
765 family bacteria in a mesotrophic lake (lake Długie Wigierskie) in the presence of  
766 black cormorants (*Phalacrocorax carbo*). Pol J Nat Sci. 2007. v. 22, p. 486-499.  
767 <http://dx.doi.org/10.2478/v10020-007-0043-2>

768

769 64. Albert MJ, Faruque SM, Ansaruzzaman M, Islam MM, Haider K, Alam K, Robins-  
770 Browne R. Sharing of virulence-associated properties at the phenotypic and genetic  
771 levels between enteropathogenic *Escherichia coli* and *Hafnia alvei*. Journal of  
772 Medical Microbiology. 1992. v. 37, n. 5, p. 310-314.  
773 <https://doi.org/10.1099/00222615-37-5-310>

774

775 65. Real F, Fernández ACOSTA, Acosta F, Acosta B, Castro P, Déniz S, Orós J.  
776 Septicemia associated with *Hafnia alvei* in laying hens. Avian diseases. 1997. p.  
777 741-747. <https://doi.org/10.2307/1592170>

778

779 66. Miniero Davies Y, Xavier de Oliveira MG, Paulo Vieira Cunha M, Soares Franco L,  
780 Pulecio Santos SL, Zanolli Moreno L, Knöbl T. *Edwardsiella tarda* outbreak

- 781 affecting fishes and aquatic birds in Brazil. *Veterinary Quarterly*. 2018. v. 38, n. 1,  
782 p. 99-105. <https://doi.org/10.1080/01652176.2018.1540070>  
783
- 784 67. Davies YM, Cunha MPV, Oliveira MGX, Oliveira MCV, Philadelpho N, Romero  
785 DC, Knöbl T. Virulence and antimicrobial resistance of *Klebsiella pneumoniae*  
786 isolated from passerine and psittacine birds. *Avian Pathology*. 2016. v. 45, n. 2, p.  
787 194-201. <https://doi.org/10.1080/03079457.2016.1142066>  
788
- 789 68. Asma-Abd-Ellatif M. Studies on enterobacteriaceae in chicken egg. 2013. MVSc, In  
790 Poultry Diseases Beni-Suef University  
791
- 792 69. Godoy SN, Cubas ZS. Principais doenças bacterianas e fúngicas em Psittaciformes –  
793 revisão. *Clínica Veterinária*. 2009. v.14, n.81, p.88-98.  
794
- 795 70. Williams JE, Dillard LH. Penetration of chicken egg shells by members of the  
796 *Arizona* group. *Avian diseases*. 1968. v. 12, n. 4, p. 645-  
797 649. <https://doi.org/10.2307/1588448>  
798
- 799 71. Windingstad RM, Trainer DO, Duncan R. *Salmonella enteritidis* and *Arizona*  
800 *hinshawii* isolated from wild sandhill cranes. *Avian diseases*. 1977. p. 704-707.  
801 <https://doi.org/10.2307/1589429>  
802
- 803 72. Sato G, Adler HE. Experimental infection of adult turkeys with *Arizona* group  
804 organisms. *Avian Diseases*. 1966. v. 10, n. 3, p. 329-336.  
805 <https://doi.org/10.2307/1588279>  
806
- 807 73. Machado DN, Lopes ES, Albuquerque ÁH, Bezerra WGA, Horn RV, Lima SVG,  
808 Teixeira RSC. Detecção e avaliação do perfil de sensibilidade antimicrobiana de  
809 enterobactérias isoladas de periquitos cara-suja (*Pyrrhura griseipectus*) em  
810 cativeiro. *Arquivo Brasileiro de Medicina Veterinária e Zootecnia*. 2016. v. 68, p.  
811 1732-1736. <https://doi.org/10.1590/1678-4162-8819>  
812
- 813 74. Gaio FC, Lopes ES, Lima BP, Carmo CC, Marques AR, Oliveira FR, Maciel WC.  
814 Bactérias zoonóticas isoladas de Passeriformes silvestres recuperados do tráfico de  
815 animais no estado do Ceará/Brasil. *Arquivo Brasileiro de Medicina Veterinária e*  
816 *Zootecnia*. 2019. v. 71, p. 1488-1496. <https://doi.org/10.1590/1678-4162-10092>  
817
- 818 75. Carreira AS. AVALIAÇÃO DA MICROBIOTA ENTÉRICA BACTERIANA  
819 DEAVES DE VIDA LIVRE CAPTURADAS NO CAMPUS DO ITAPERI DA  
820 UNIVERSIDADE ESTADUAL DO CEARÁ, FORTALEZA-CE. 2019. 72 f.  
821 Dissertação (Mestrado) - Curso de Programa de Pós-graduação em ciências  
822 Veterinárias, Universidade Estadual do Ceará, Fortaleza – Ceará. Disponível em:  
823 <[http://www.uece.br/ppgcvwp/wpcontent/uploads/sites/6/2019/08/ArianneCarreira\\_](http://www.uece.br/ppgcvwp/wpcontent/uploads/sites/6/2019/08/ArianneCarreira_Disserta%C3%A7%C3%A3o.pdf)  
824 [Disserta%C3%A7%C3%A3o.pdf](http://www.uece.br/ppgcvwp/wpcontent/uploads/sites/6/2019/08/ArianneCarreira_Disserta%C3%A7%C3%A3o.pdf)>. Acesso em: 06 jan. 2020.  
825
- 826 76. Tsubokura M, Matsumoto A, Otsuki K, Animas SB, Sanekata T. Drug resistance and  
827 conjugative R plasmids in *Escherichia coli* strains isolated from migratory  
828 waterfowl. *Journal of wildlife diseases*. 1995 v. 31, n. 3, p. 352-357.  
829 <https://doi.org/10.7589/0090-3558-31.3.352>

830

831 77. Carter DL, Docherty KM, Gill SA, Baker K, Teachout J, Vonhof MJ. Antibiotic  
832 resistant bacteria are widespread in songbirds across rural and urban environments.  
833 Science of the Total Environment. 2018. v. 627, p. 1234-1241.  
834 <https://doi.org/10.1016/j.scitotenv.2018.01.343>

835

836 78. Shobrak MY, Abo-Amer AE. Role of wild birds as carriers of multi-drug resistant  
837 Escherichia coli and Escherichia vulneris. Brazilian Journal of Microbiology. 2014.  
838 v. 45, p. 1199-1209. <https://dx.doi.org/10.1590%2Fs1517-83822014000400010>

839

840 79. Giacobello C, Foti M, Mascetti A, Grosso F, Ricciardi D, Fisichella V, Piccolo FL.  
841 Antimicrobial resistance patterns of Enterobacteriaceae in European wild bird  
842 species admitted in a wildlife rescue centre. Vet. Ital. 2016. v. 52, p. 139-144. doi:  
843 10.12834/VetIt.327.1374.2

844

845 80. Ramey AM, Hernandez J, Tyrlöv V, Uher-Koch BD, Schmutz JA, Atterby C,  
846 Bonnedahl J. Antibiotic-resistant *Escherichia coli* in migratory birds inhabiting  
847 remote Alaska. EcoHealth. 2018. v. 15, n. 1, p. 72-81. doi: 10.1007/s10393-017-  
848 1302-5

849

850 81. Tormoehlen K, Johnson-Walker YJ, Lankau EW, San Myint M, Herrmann JA.  
851 Considerations for studying transmission of antimicrobial resistant enteric bacteria  
852 between wild birds and the environment on intensive dairy and beef cattle  
853 operations. PeerJ. 2019. v. 7, p. e6460. doi:10.7717/peerj.6460

854

855 82. Iroha I, Afiukwa F, Oji A, Ejikeugwu P, Nwakeze E. Occurrence of extended  
856 spectrum beta lactamase producing *Escherichia coli* from human clinical and wild  
857 birds (pigeons, bats, parrots and ducks) samples from Ebonyi state, Nigeria. World  
858 J. Pharm. Sci. 2015. v. 4, p. 20-29.

859

860 83. Sousa ATHI, Makino H, Bruno VCM, Candido SL, Nogueira BS, Menezes IG,  
861 Dutra V. Perfil de resistência antimicrobiana de *Klebsiella pneumoniae* isoladas de  
862 animais domésticos e silvestres. Arquivo Brasileiro de Medicina Veterinária e  
863 Zootecnia. 2019. v. 71, p. 584-593. <https://doi.org/10.1590/1678-4162-10599>

864

865 84. Ong KH, Khor WC, Quek JY, Low ZX, Arivalan S, Humaidi M, Aung KT.  
866 Occurrence and antimicrobial resistance traits of *Escherichia coli* from wild birds  
867 and rodents in Singapore. International Journal of Environmental Research and  
868 Public Health. 2020. v. 17, n. 15, p. 5606. <https://doi.org/10.3390/ijerph17155606>

869

870 85. Foti M, Grasso R, Fisichella V, Mascetti A, Zafarana MA, Colnaghi M, Spena MT.  
871 Analysis of Eurasian Stone curlew (*Burhinus oedicnemus*) microbial flora reveals  
872 the presence of multi-drug resistant pathogens in agro-pastoral areas of Sicily  
873 (Italy). Heliyon. 2020. v. 6, n. 10, p. e05401.  
874 <https://doi.org/10.1016/j.heliyon.2020.e05401>

875

876 86. Khan MU, Yousuf RI, Shoaib MH. Drug utilization evaluation of meropenem and  
877 correlation of side effects with renal status of patients in a teaching based hospital.  
878 Pak J Pharm Sci. 2014. v. 27, n. 5, p. 1503-8. PMID: 25176244.



879

880 87. Blumentrath CG, Müller G, Teichmann D, Tiesmeier J, Petridou J. Relapse of  
881 typhoid fever following delayed response to meropenem: a case report and review of  
882 previously published cases indicating limited clinical efficacy of meropenem for the  
883 treatment of typhoid fever. *GMS German Medical Science*. 2019. v. 17.  
884 doi:10.3205/000267

885

886 88. De Camargo TV, da Silva Junior JM, Junior ÉMS, Santos VJ, Rocha A, Lanchote  
887 VL, de Souza Gomez D. Abordagem farmacocinética-farmacodinâmica (PK/PD) na  
888 avaliação da efetividade do Meropenem em pacientes sépticos queimados  
889 adolescentes versus adultos jovens/PK/PD approach to evaluate Meropenem  
890 effectiveness in critically ill burn adolescents versus young adults undergoing  
891 therapy of septic shock. *Brazilian Journal of Health Review*. 2021. v. 4, n. 1, p.  
892 1213-1232. doi:10.34119/bjhrv4n1-107

893

894 89. Guerra B, Fischer J, Helmuth R. An emerging public health problem: acquired  
895 carbapenemase-producing microorganisms are present in food-producing animals,  
896 their environment, companion animals and wild birds. *Veterinary microbiology*.  
897 2014. v. 171, n. 3-4, p. 290-297. <https://doi.org/10.1016/j.vetmic.2014.02.001>

898

899 90. Nascimento AM, Cursino L, Gonçalves-Dornelas H, Reis A, Chartone-Souza E,  
900 Marini MÂ. Antibiotic-resistant Gram-negative bacteria in birds from the Brazilian  
901 Atlantic forest. *The Condor*. 2003. v. 105, n. 2, p. 358-361.  
902 <https://doi.org/10.1093/condor/105.2.358>

903

904 91. Ledeberg J. Infectious disease as an evolutionary paradigm. *Emerging infectious*  
905 *diseases*. 1997. v. 3, n. 4, p. 417. doi: 10.3201/eid0304.970402

906

907 92. Singer RS, Ward MP, Maldonado G. Erratum: Can landscape ecology untangle the  
908 complexity of antibiotic resistance?. *Nature Reviews Microbiology*. 2007. v. 5, n. 1,  
909 p. 82-82. <https://doi.org/10.1038/nrmicro1593>

910

911 93. Gottdenker NL, Walsh T, Vargas H, Merkel J, Jiménez GU, Miller RE, Parker PG.  
912 Assessing the risks of introduced chickens and their pathogens to native birds in the  
913 Galápagos Archipelago. *Biological Conservation*. 2005. v. 126, n. 3, p. 429-439.  
914 <https://doi.org/10.1016/j.biocon.2005.06.025>

915

916 94. Pallecchi L, Lucchetti C, Bartoloni A, Bartalesi F, Mantella A, Gamboa H,  
917 Rossolini GM. Population structure and resistance genes in antibiotic-resistant  
918 bacteria from a remote community with minimal antibiotic exposure. *Antimicrobial*  
919 *agents and chemotherapy*. 2007. v. 51, n. 4, p. 1179-1184. doi:  
920 <https://doi.org/10.1128/AAC.01101-06>

921

922 95. Bartoloni A, Pallecchi L, Rodríguez H, Fernandez C, Mantella A, Bartalesi F,  
923 Rossolini GM. Antibiotic resistance in a very remote Amazonas community.  
924 *International journal of antimicrobial agents*. 2009. v. 33, n. 2, p. 125-129.  
925 <https://doi.org/10.1016/j.ijantimicag.2008.07.029>

926

- 927 96. Portugal DSG. Prevalência de bactérias resistentes a antimicrobianos em água  
928 natural. 2015. 84 f. Dissertação (Mestrado). Mestrado Integrado em Engenharia  
929 Química. Faculdade de Engenharia. Universidade do Porto.  
930
- 931 97. Hernández J, González-Acuña D. Anthropogenic antibiotic resistance genes  
932 mobilization to the polar regions. *Infection ecology & epidemiology*. 2016. v. 6, n.  
933 1, p. 32112. <https://doi.org/10.3402/iee.v6.32112>  
934
- 935 98. Salyers AA, Amabile-Cuevas CF. Why are antibiotic resistance genes so resistant to  
936 elimination?. *Antimicrobial agents and chemotherapy*. 1997. v. 41, n. 11, p. 2321-  
937 2325. <https://doi.org/10.1128/AAC.41.11.2321>. PMID: 9371327  
938
- 939 99. Brinkmeyer R, Knittel K, Jürgens J, Weyland H, Amann R, Helmke E. Diversity  
940 and structure of bacterial communities in Arctic versus Antarctic pack ice. *Applied  
941 and environmental microbiology*. 2003. v. 69, n. 11, p. 6610-6619.  
942 <https://doi.org/10.1128/AEM.69.11.6610-6619.2003>  
943
- 944 100. Benskin CMH, Wilson K, Jones K, Hartley IR. Bacterial pathogens in wild  
945 birds: a review of the frequency and effects of infection. *Biological Reviews*. 2009.  
946 v. 84, n. 3, p. 349-373. doi:10.1111/j.1469-185x.2008.00076.x  
947
- 948 101. Bonnedahl J, Järhult JD. Antibiotic resistance in wild birds. *Upsala journal of  
949 medical sciences*. 2014. v. 119, n. 2, p. 113-116.  
950 <https://doi.org/10.3109/03009734.2014.905663>  
951
- 952 102. Allen HK, Donato J, Wang HH, Cloud-Hansen KA, Davies J, Handelsman J.  
953 Call of the wild: antibiotic resistance genes in natural environments. *Nature  
954 Reviews Microbiology*. 2010. v. 8, n. 4, p. 251-259. doi:10.1038/nrmicro2312  
955
- 956 103. Martinez JL. The role of natural environments in the evolution of resistance  
957 traits in pathogenic bacteria. *Proceedings of the Royal Society B: Biological  
958 Sciences*. 2009. v. 276, n. 1667, p. 2521-2530.  
959 <https://doi.org/10.1098/rspb.2009.0320>
